# Supplementary material
Source: Springer Nature journal article supplement (https://www.springermedizin.de/resource/supplementary/12913_2011_2093_MOESM3_ESM.pdf/9529868)

## Distribution of studies by time period

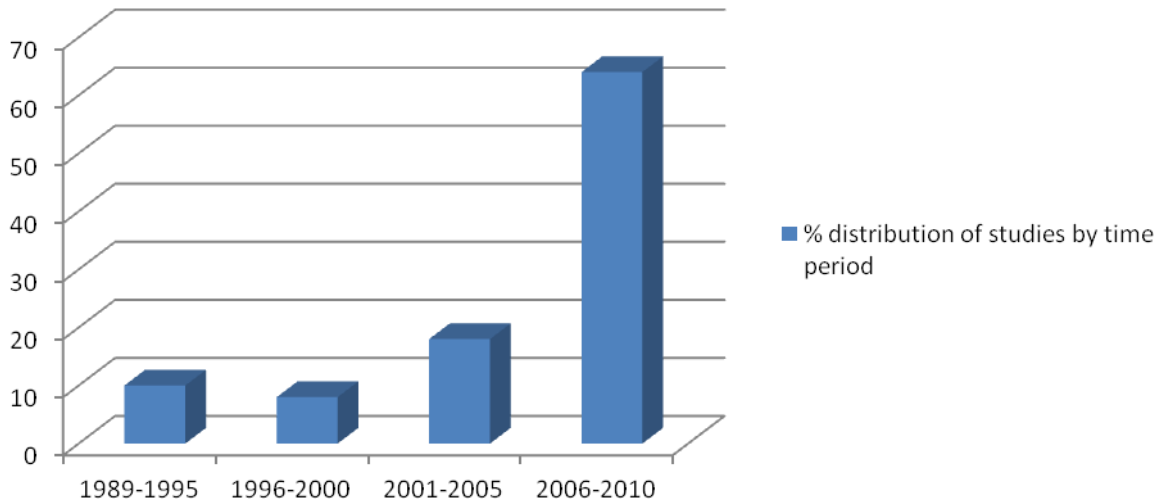

Supplement: MOESM3 [file 9529868]
